# Supplementary material for: Response and Tolerance of Macleaya cordata to Excess Zinc Based on Transcriptome and Proteome Patterns
Source: MDPI journal article supplement (doi:10.3390/plants12122275), 2023-06-11
Supplement: s1 [file s1]

*Supplementary Materials*

*Article*

# Response and tolerance of *Macleaya cordata* to excess zinc based on transcriptome and proteome patterns

Hongxiao Zhang<sup>1\*</sup>, Linfeng Hu<sup>2</sup>, Xinlong Du<sup>1</sup>, Assar Ali Shah<sup>3</sup>, Baseer Ahmad<sup>3</sup>, Liming Yang<sup>3</sup>, Zhiying Mu<sup>4\*</sup>

<sup>1</sup> College of Agriculture, Henan University of Science and Technology, Luoyang, China; hxzhang@haust.edu.cn; dxl200004@sina.com

<sup>2</sup> College of Biotechnology, Tianjin University of Science and Technology, Tianjin, China; henryhu391@gmail.com

<sup>3</sup> College of Life Sciences, Nanjing Forestry University, Nanjing, China; assaralishah@yahoo.com; dr.baseerahmadkhan@gmail.com; yangliming@njfu.edu.cn

<sup>4</sup> College of Forestry and Biotechnology, Zhejiang Agriculture and Forestry University, Hangzhou, China; zhiyingmu6@163.com

\* Correspondence: hxzhang@haust.edu.cn; zhiyingmu2023@sina.com

**Table S1.** Transcriptome sequencing data of *Macleay cordata* leaves under Zn treatment.

| Samples | Read Number | Base Number | GC Content | %≥Q30 |
|---------|-------------|-------------|------------|-------|
| CK-1    | 24079770    | 7223931000  | 43.52      | 92.78 |
| CK-2    | 22351713    | 6705513900  | 44.08      | 93.72 |
| CK-3    | 18952705    | 5685811500  | 43.34      | 95.08 |
| Zn 1d-1 | 22030032    | 6609009600  | 44.36      | 95.15 |
| Zn 1d-2 | 23837633    | 7151289900  | 44.75      | 95.20 |
| Zn 1d-3 | 21502239    | 6450671700  | 44.11      | 94.77 |
| Zn 7d-1 | 22848084    | 6854425200  | 44.31      | 94.72 |
| Zn 7d-2 | 21969066    | 6590719800  | 44.78      | 94.89 |
| Zn 7d-3 | 21566127    | 6469838100  | 43.71      | 94.78 |

**Table S2.** Primers of some genes for quantitative real-time PCR in *Macleay cordata* leaves under Zn treatment.

| Primer name       | Sequence (From 5' to 3') |
|-------------------|--------------------------|
| <i>Mc18S-F</i>    | CTTCGGGATCGGAGTAATGA     |
| <i>Mc18S-R</i>    | GCGGAGTCCTAGAAGCAACA     |
| <i>McABCX1-F</i>  | CGGTCGCAGACAACATAAGA     |
| <i>McABCX1-R</i>  | AAGGTCAGCAAGGTTGAGTAG    |
| <i>McABCX3-F</i>  | AGTGGCAGTGGCAAATCA       |
| <i>McABCX3-R</i>  | AGGGAGAGAACATCGAGATCA    |
| <i>McTDT-F</i>    | CCTCGTTCTTGGGAGCTTTATC   |
| <i>McTDT-R</i>    | TAGAGGCTCCACGCAGAATA     |
| <i>McVIT-F</i>    | GGTCTCCACAGCATCTTTGA     |
| <i>McVIT-R</i>    | ACTACAAGCTCCGGCTACTA     |
| <i>McMT3c-F</i>   | TGTTCTTCTGCTCCAACGTC     |
| <i>McMT3c-R</i>   | GTGAGGAAGGAGAGCCAATATG   |
| <i>McWRKY-F</i>   | TGGAGAAAGCCCTGAATTGG     |
| <i>McWRKY-R</i>   | AAGATGAAGACGGGTTGAGATG   |
| <i>McMYB-F</i>    | GGAATCTGACCCACCAACAA     |
| <i>McMYB-R</i>    | AACCCAGCAGGAACATTCTC     |
| <i>McERF105-F</i> | TGGACGTCTATTGGGAGAATG    |
| <i>McERF105-R</i> | GATGACCATCAGCTGGGAATAA   |
| <i>McERF61-F</i>  | TTATGATCGTGCGGCGTATAA    |
| <i>McERF61-R</i>  | AAGCCTCGAGTTGTCTCTAAAC   |
